# Supplementary material for: Molecular modeling of ions at interfaces: exploring similarities to hydrophobic solvation through the lens of induced aqueous interfacial fluctuations
Source: Royal Society of Chemistry journal article supplement (doi:10.1039/c6cp04112d), 2016-01-01
Supplement: c6cp04112d1.pdf [file c6cp04112d1.pdf]

**Supporting Information: Modeling Ion Specific Effects: Toward the Correlations with  
Hydrophobic Solvation via Aqueous Interfacial Fluctuations**

Shu-Ching Ou

*Sealy Center for Structural Biology and Molecular Biophysics,*

*University of Texas Medical Branch, 301 University Boulevard, Galveston, Texas 77555, USA*

Di Cui and Sandeep Patel\*

*Department of Chemistry and Biochemistry, University of Delaware, Newark, Delaware 19716, USA*

---

\*Corresponding author. E-mail: [sapatel@udel.edu](mailto:sapatel@udel.edu)

I. POTENTIAL OF MEAN FORCE: SINGLE ALKANE & ALCOHOL TRANSFERRING THE AIR-WATER INTERFACE

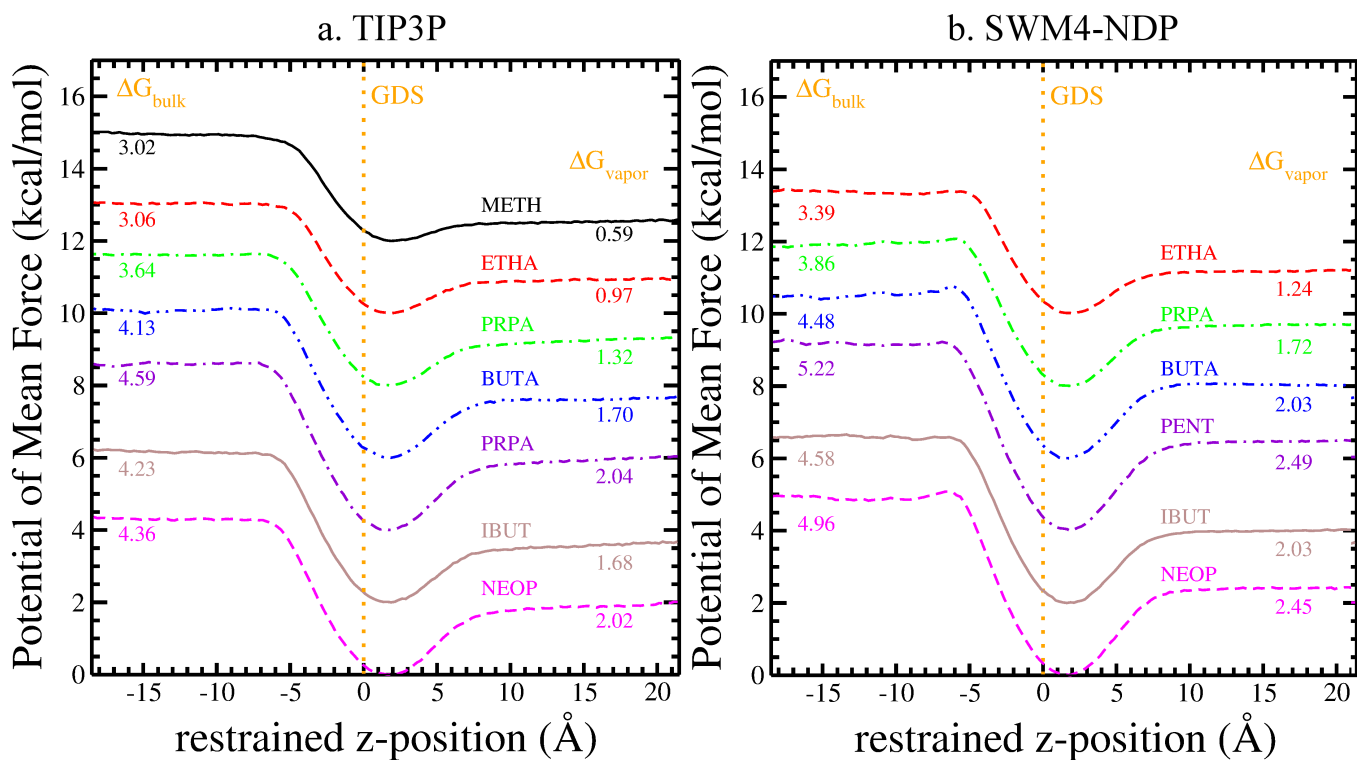

FIG. S1: Potential of mean force as a function of the  $z$ -position of a single alkane along the direction normal to the (a) TIP3P (b) SWM4-NDP water surface. An offset of 2 kcal/mol is added at the minimum state for clarity. Numbers below the PMF's indicate the free energy difference between bulk/vapor state ( $z = -18$  or  $22$  Å) and the global minimum, which are marked as  $\Delta G_{\text{bulk}}/\Delta G_{\text{vapor}}$ . Reproduced from ref<sup>1</sup> with permission from the PCCP Owner Societies.

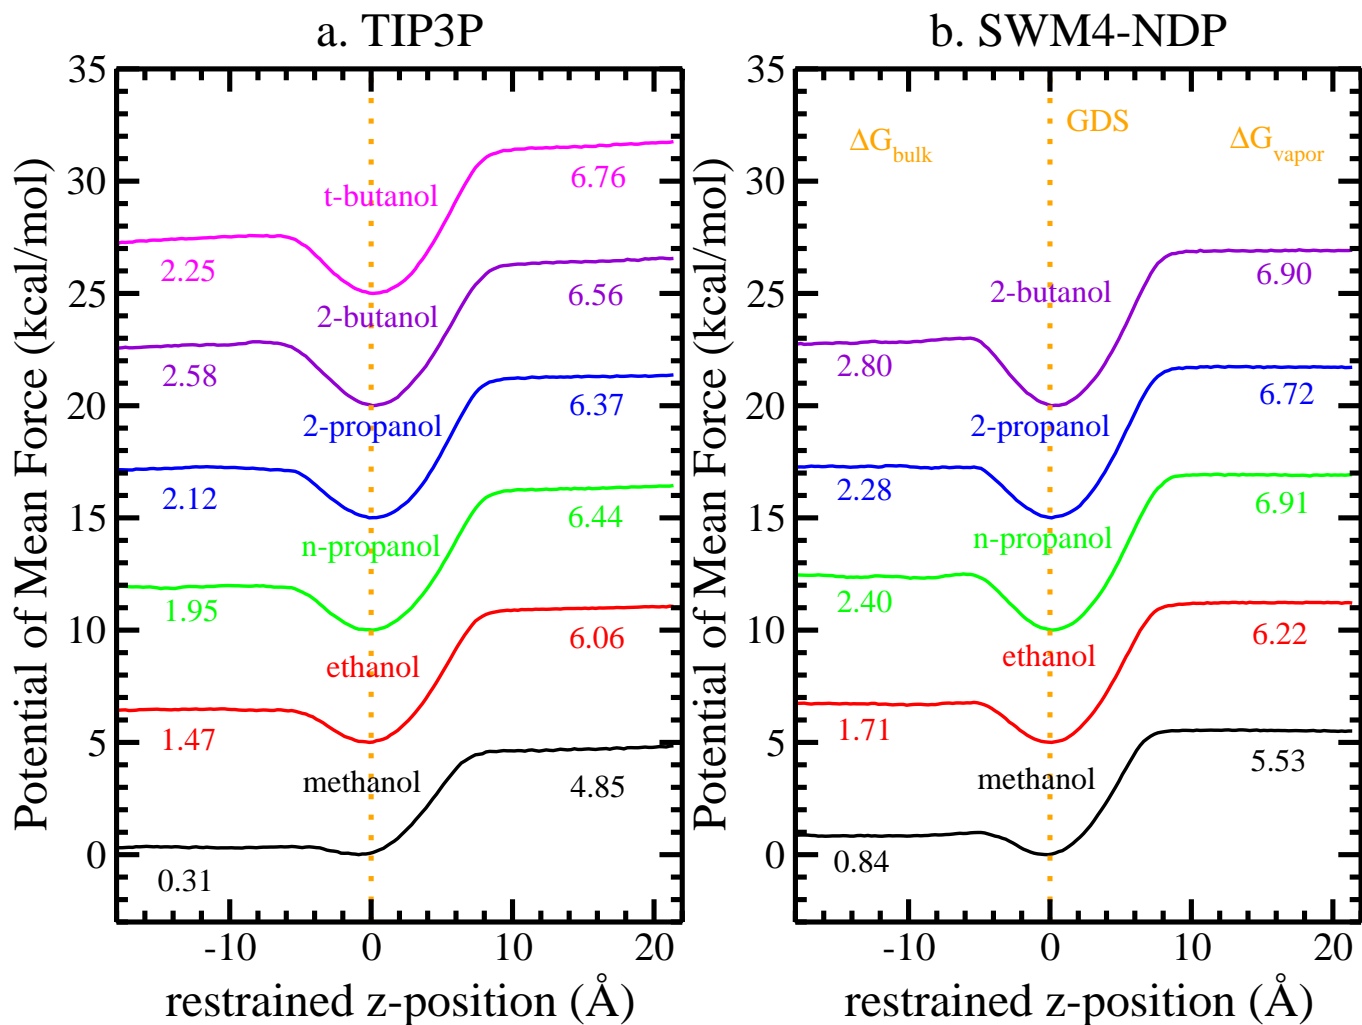

FIG. S2: Potential of mean force as a function of the  $z$ -position of a single alcohol along the direction normal to the (a) TIP3P (b) SWM4-NDP water surface. An offset of 5 kcal/mol is added at the minimum state for clarity. Numbers below the PMF's indicate the free energy difference between bulk/vapor state ( $z = -18$  or  $22$  Å) and the global minimum, which are marked as  $\Delta G_{\text{bulk}}/\Delta G_{\text{vapor}}$ .

---

[1] S. C. Ou, D. Cui, and S. Patel, *Phys. Chem. Chem. Phys.* **16**, 26779 (2014).
